1  
2  
3  
4  
5  
6  
7  
8  
9  
10  
11  
12  
13  
14  
15  
16  
17  
18  
19  
20  
21  
22  
23  
24  
25  
26  
27  
28  
29  
30  
31  
32  
33  
34  
35  
36  
37  
38  
39  
40

**The Association Between Dietary Changes to Lose Weight and Mental Health Status in the National Health and Nutrition Examination Survey, 2005-2006**

Jihyun Jane Min<sup>1\*</sup>, Keeyoon Noh<sup>2</sup>, Sojeong Nam<sup>3</sup>, Alejandra Ellison-Barnes<sup>4</sup>

<sup>1</sup>Krieger School of Arts and Sciences, Johns Hopkins University, Baltimore, Maryland, United States of America

<sup>2</sup>College of Social Sciences, University of Ulsan, Ulsan, South Korea

<sup>3</sup> Department of Counselor Education and Supervision, The University of New Mexico, Albuquerque, New Mexico, United States of America

<sup>4</sup> Department of General Internal Medicine, Johns Hopkins University School of Medicine, Baltimore, Maryland, United States of America

\* Corresponding author  
E-mail: [jmin17@jh.edu](mailto:jmin17@jh.edu)

41

## Abstract

42 **Background:** Weight loss is a common endeavor taken by millions of residents annually in  
43 the U.S.—a country with a 31% overweight and 42% obesity rate. Weight loss is associated with  
44 numerous physical health benefits, such as better cardiovascular health. However, unhealthy  
45 weight loss strategies can cause adverse mental health effects. Past research has focused on how  
46 weight loss strategies affect the mental health of a general population—rather than those who are  
47 trying to lose weight—or has investigated a diverse array of weight loss strategies. This paper  
48 explores how dietary changes for weight loss are associated with mental health, specifically  
49 through several variables used in the Patient Health Questionnaire-9 (PHQ9), which measures  
50 depression severity. We hypothesize that eating less and skipping meals will be associated with  
51 poorer mental health status, while eating fewer carbohydrates, eating less fat, and drinking more  
52 water will be associated with better mental health status.

53 **Methods and Findings:** This study uses the U.S. 2005-2006 National Health and  
54 Nutrition Examination Survey (NHANES) 2005. Univariate (descriptive statistics), bivariate  
55 (correlation coefficient), and multivariate (ordinal logistic regression) analyses were performed.  
56 The main results show that ‘skipped meals’ was positively associated with ‘feeling bad about  
57 yourself,’ ‘feeling down, depressed, or hopeless,’ and ‘little interest in doing things.’ ‘Ate fewer  
58 carbohydrates’ was negatively associated with the ‘little interest in doing things.’

59 **Conclusion:** Differing dietary changes used for weight loss, particularly skipping meals and  
60 eating fewer carbohydrates, are associated with differences in mental health status. Health care  
61 professionals providing weight loss guidance should be cognizant of patients’ baseline mental  
62 health and the potential for changes in mental health with different dietary strategies. Future

63 research employing a longitudinal approach to determine whether there is evidence of a causal  
64 relationship between these and other dietary strategies and subsequent mental health outcomes.

## 65 **Introduction**

66 With approximately 42% of its population being obese and 31% overweight, the United  
67 States holds millions of individuals attempting weight loss in a given year [1]. In fact, in 2013-  
68 2016, one-half of the U.S. population attempted to lose weight within the prior year [2]. Weight  
69 loss can reduce the likelihood of the long-term health consequences associated with obesity—  
70 including cancer, diabetes, and cardiovascular disease—and has added benefits, such as better  
71 physical mobility [1,3].

72 Due to its benefits, weight loss has been recommended by physicians at a rate of about  
73 80% for individuals with obesity [4], but often advice of this nature has been vague and generic:  
74 simply suggesting that patients “eat less, do more” [5]. While this advice conveys the  
75 physiological core of weight loss, which is to have greater energy expenditure than energy intake  
76 from food consumption, without being given practical advice, individuals can respond to this  
77 recommendation through a variety of dietary changes that may impact not only their physical  
78 health but also their mental health. This advice also does not address the numerous determinants  
79 that factor into the success of weight loss, such as genetics, neighborhood, or food environment  
80 [6].

81 Prior literature demonstrates that weight loss and mental health have a multi-faceted  
82 relationship. A systematic review of several studies found nine that discovered an association  
83 between weight loss and improved mental health scores [7]. On the other hand, a different cohort  
84 study found that weight loss was linked to a greater likelihood of depression [8]. The leading

85 author from the aforementioned cohort study posits that this is not due to the weight loss itself  
86 but the stresses of dieting, such as through the deprivation of food [9].

87 Several studies have examined how certain dietary changes that lead to weight loss are  
88 associated with changes in mental health. Many individuals attempting weight loss reduce  
89 carbohydrate intake since this macromolecule is found in energy-dense foods, such as pretzels or  
90 sugar-sweetened beverages, that contribute to weight gain [10]. A majority of studies conclude  
91 that excessive carbohydrate consumption is related to poorer mental health outcomes,  
92 particularly anxiety and depression [11–13]. However, a systematic review of controlled trials by  
93 Varae et al. (2022) examining how low carbohydrate diets can influence depression and anxiety  
94 status concluded there was no significant association [14].

95 Fats are also often associated with weight gain, but studies examining their effects on  
96 mental health have mixed results. One experimental study found a linkage between increased  
97 susceptibility to depression and anxiety in mice that were fed high-fat diets, particularly with  
98 excess saturated fat, by impacting their neurological functions [15]. In contrast, low-fat diets  
99 were found to be related to greater anger and hostility for humans aged 20-37 [16]. There also  
100 seems to be a difference in results based on the type of fat consumed—while saturated fatty acids  
101 are positively associated with anxiety [17], unsaturated fatty acids, such as  $\alpha$ -linolenic acid, were  
102 correlated with reduced likelihood for anxiety and depression [17,18]. Lastly, a few studies  
103 found no association between the level of fat consumption and mental health status or mood  
104 [19,20].

105 Drinking more water has also been shown to assist in weight loss through appetite  
106 suppression and reducing the average caloric intake for an individual [21]. Water can facilitate  
107 energy expenditure and lipolysis when the body breaks down fats for energy [22]. With its

108 numerous physiological benefits, drinking water has been shown to greatly improve mood [23].  
109 Conversely, dehydration was associated with increased tension/anxiety in studies examining this  
110 relationship for men (24).

111 Lastly, eating less and skipping meals allows for weight loss by reducing caloric  
112 consumption overall. In extreme forms, these methods pose risks for negative mental health  
113 outcomes as individuals are not consuming the micro and macronutrients essential for  
114 “preservation of normal brain function and [mental] well-being” [25, p.8]. A systematic review  
115 and meta-analysis found that breakfast skipping was related to depression, stress, and  
116 psychological distress (26). Additionally, for children, meal skipping was related to adolescent  
117 psychological complaints (27).

118 While abundant research has investigated how specific dietary changes can result in  
119 weight loss and impact people’s mental health, many have utilized general populations of people  
120 who may not be intentionally losing weight. For studies that focused on individuals with  
121 intentional weight loss, they do not focus on how specifically dietary changes are associated with  
122 mental health outcomes. Rather, they investigate a variety of changes that can lead to weight  
123 loss, such as lifestyle changes, weight-loss programs, or gastric bypass surgery (28–30). Noting  
124 this gap in the existing literature, we sought to determine whether a variety of dietary changes  
125 made by individuals seeking weight loss were associated with differing mental health status.  
126 Using a nationally representative sample, we evaluated the relationship between individuals’  
127 dietary approaches to weight loss and their mental health status. We hypothesized that eating  
128 fewer carbohydrates, eating less fat, and drinking more water would be associated with better  
129 mental health status while eating less and skipping meals would be associated with poorer mental  
130 health status.

## Methods

131

### 132 **Data Source**

133           This study used a nationally representative sample of the US population from the  
134 National Health and Nutrition Examination Survey (NHANES) 2005-2006, the results of which  
135 are publicly available. There is no special access to data from NHANES. Public use data files  
136 were used for the analysis and the dataset was downloaded directly from the CDC website.  
137 NHANES includes information on the health and nutrition status of adults and children, obtained  
138 through individual interviews and physical examinations (31). This survey was conducted by the  
139 National Center for Health Statistics (NCHS) periodically from 1971 to 1994. In 1999, the  
140 NHANES shifted to continuous data collection with a focus on a variety of health and nutrition  
141 measurements to meet emerging concerns [31]. The survey includes a nationally representative  
142 sample of approximately 5,000 participants each year across the US, with an oversampling of  
143 African Americans and Mexican Americans to provide accurate estimates for those populations  
144 [31]. We included adults aged 20 years and older and excluded those who responded ‘don’t  
145 know’ and/or ‘refuse’ for the variables of interest.

### 146 **Ethics Statement**

147           All protocols were reviewed and approved by the NCHS Ethics Review Board with the  
148 U.S. Department of Health and Human Services Policy for Protection of Human Research  
149 Subjects before NHANES was implemented (32). Furthermore, this study was acknowledged by  
150 the Johns Hopkins University Institutional Review Board as Not Human Subjects Research  
151 (IRB00404102) and as a Quality Improvement project. Formal consent was not obtained as the  
152 dataset had all patient identifiers removed.

### 153 **Measures**

154 *Mental health variables.* To measure overall mental health conditions, we selected four  
155 questions from the dataset. The first question was, “Over the last 2 weeks, how often have you  
156 been bothered by feeling bad about yourself?” Participants answered by selecting from ‘not at all  
157 (0),’ ‘several days (1),’ ‘more than half the days (2),’ and ‘nearly every day (3).’ The second  
158 question was, “Over the last 2 weeks, how often have you been bothered by feeling down,  
159 depressed, or hopeless?” Participants answered by selecting from ‘not at all (0),’ ‘several days (1),’  
160 ‘more than half the days (2),’ and ‘nearly every day (3).’ The third question was, “Over the last 2  
161 weeks, how often have you been bothered by the following problems: little interest or pleasure in  
162 doing things? Would you say...” Participants answered by selecting from ‘not at all (0),’ ‘several  
163 days (1),’ ‘more than half the days (2), and ‘nearly every day (3).’ The fourth question was, "how  
164 many days during the past 30 days has your mental health not been good?" To answer, participants  
165 directly provided the number of days. The first three survey questions are part of the Patient Health  
166 Questionnaire-9 (PHQ9) that measures depression severity [32].

167 *Dietary variables.* Participants were asked, “How did you try to lose weight?” and were  
168 provided with a card with options that included, ‘ate less fat,’ ‘ate fewer carbohydrates,’ ‘drank a  
169 lot of water,’ ‘ate less food,’ and ‘skipped meals,’ among other choices. Respondents were  
170 prompted to select all that applied.

171 *Covariates.* We controlled for participants’ age, sex, race, educational level, and annual  
172 household income.

173 *A summary of the variables and the questions asked for this study can be found in the tables*  
174 *below:*

175 Mental Health variables:

| Description | Question asked |
|-------------|----------------|
|-------------|----------------|

|                                        |                                                                                                                                                                                                   |
|----------------------------------------|---------------------------------------------------------------------------------------------------------------------------------------------------------------------------------------------------|
| No. of days mental health was not good | Now thinking about {your/SP's} mental health, which includes stress, depression, and problems with emotions, for how many days during the past 30 days was {your/his/her} mental health not good? |
| Feeling bad about yourself             | Over the last 2 weeks, how often have you been bothered by the following problems:] feeling bad about yourself - or that you are a failure or have let yourself or your family down?              |
| Feeling down, depressed, or hopeless   | Over the last 2 weeks, how often have you been bothered by the following problems: feeling down, depressed, or hopeless?                                                                          |
| Little interest in doing things        | Over the last 2 weeks, how often have you been bothered by the following problems: little interest or pleasure in doing things? Would you say...                                                  |

176

## 177 **Statistical Analysis**

178 For the study, the quantitative software IBM SPSS was used for univariate (descriptive  
179 statistics), bivariate (correlation coefficient), and multivariate (ordinal logistic regression and  
180 negative binomial regression models) analyses.

181

## **Results**

182 We included a total of 3,975 participants in our sample (Table 1). The average age was  
183 47.54 years old (SD = 17.85), ranging from 20 to 84.92 years; 48.3% of participants were male  
184 (n = 1,919), and 51.7% were female (n = 2,056). In terms of race/ethnicity, 50.9% of participants  
185 were non-Hispanic White (n = 2,022), 22.6% were non-Hispanic Black (n = 898), 22.7% were  
186 Mexican American (n = 904), and 3.8% identified as other race or multi/bi-racial (n = 151).  
187 Education levels varied among our sample: 25.9% had less than a high school education (n =  
188 1,030), 23.9% had a high school diploma or GED (n = 952), 29.1% had some college or an AA  
189 degree (n = 1,158), and 21% had a college degree or higher (n = 835). The average annual  
190 household income was \$38,199.68 (SD = \$12,349.53).



191 For the mental health variables, about 14% of the participants reported that they ‘[felt]  
 192 bad about [themselves]’ for several days or longer over the last two weeks. 22% reported ‘feeling  
 193 down, depressed, or hopeless’ for several days or longer, and about 20% had ‘little interest in  
 194 doing things’ for several days or longer. The mean ‘number of days mental health was not good’  
 195 during the past month was 3.56.

196 In terms of dietary changes to lose weight, the number of respondents who marked ‘yes’  
 197 for the options ‘drank a lot of water,’ ‘ate less fat’ and ‘ate fewer carbohydrates’ were 20.9% (n  
 198 = 831), 19.2% (n = 765), and 14.1% (n = 561), respectively. For the other dietary variables, the  
 199 numbers of respondents who responded ‘yes’ to ‘ate less food’ and ‘skipped meals’ were 29.7%  
 200 (n = 1,179) and 9.3% (n = 370), respectively.

201 **Table 1. Descriptive statistics for the variables in the analyses (n = 3,975; NHANES 2005-**  
 202 **2006).**

| Variables                             | n     | %    | Mean | SD   | Min | Max |
|---------------------------------------|-------|------|------|------|-----|-----|
| <b>Dependent Variables</b>            |       |      |      |      |     |     |
| Feeling bad about yourself            |       |      |      |      |     |     |
| Not at all                            | 3,409 | 85.8 |      |      |     |     |
| Several days                          | 407   | 10.2 |      |      |     |     |
| More than half the days               | 83    | 2.1  |      |      |     |     |
| Nearly every day                      | 76    | 1.9  |      |      |     |     |
| Feeling down, depressed, or hopeless  |       |      |      |      |     |     |
| Not at all                            | 3,111 | 78.3 |      |      |     |     |
| Several days                          | 618   | 15.5 |      |      |     |     |
| More than half the days               | 152   | 3.8  |      |      |     |     |
| Nearly every day                      | 94    | 2.4  |      |      |     |     |
| Little interest in doing things       |       |      |      |      |     |     |
| Not at all                            | 3,188 | 80.2 |      |      |     |     |
| Several days                          | 534   | 13.4 |      |      |     |     |
| More than half the days               | 153   | 3.8  |      |      |     |     |
| Nearly every day                      | 100   | 2.5  |      |      |     |     |
| N. of days mental health was not good | 3975  | 100  | 3.56 | 7.58 | 0   | 30  |
| <b>Independent Variables</b>          |       |      |      |      |     |     |
| Healthy Diet                          |       |      |      |      |     |     |
| Drank much water (yes)                | 831   | 20.9 |      |      |     |     |
| Ate less fat to lose weight (yes)     | 765   | 19.2 |      |      |     |     |

|                                    |       |      |             |             |    |       |
|------------------------------------|-------|------|-------------|-------------|----|-------|
| Ate few carbs (yes)                | 561   | 14.1 |             |             |    |       |
| Unhealthy Diet                     |       |      |             |             |    |       |
| Ate less food to lose weight (yes) | 1,179 | 29.7 |             |             |    |       |
| Skipped meals (yes)                | 370   | 9.3  |             |             |    |       |
| Covariates                         |       |      |             |             |    |       |
| Age                                |       |      | 47.54       | 17.85       | 20 | 84.92 |
| Sex                                |       |      |             |             |    |       |
| Male                               | 1,919 | 48.3 |             |             |    |       |
| Female                             | 2,056 | 51.7 |             |             |    |       |
| Race                               |       |      |             |             |    |       |
| White                              | 2,022 | 50.9 |             |             |    |       |
| African American                   | 898   | 22.6 |             |             |    |       |
| Hispanic                           | 904   | 22.7 |             |             |    |       |
| Other race                         | 151   | 3.8  |             |             |    |       |
| Educational level                  |       |      |             |             |    |       |
| Less than high school              | 1,030 | 25.9 |             |             |    |       |
| High school/GED                    | 952   | 23.9 |             |             |    |       |
| College level/AA                   | 1,158 | 29.1 |             |             |    |       |
| College or above                   | 835   | 21   |             |             |    |       |
| Annual household income            |       |      | \$38,199.68 | \$12,349.53 |    |       |

203

204 In the bivariate analysis (Table 2), all of the dietary changes were significantly correlated  
 205 with at least one mental health status. ‘Ate less food’ was significantly correlated with ‘number  
 206 of days mental health was not good.’ ‘Ate fewer carbohydrates’ and ‘ate less fat’ were  
 207 significantly associated with ‘little interest in doing things.’ ‘Drank a lot of water’ was associated  
 208 with ‘feeling down, depressed, or hopeless,’ and ‘number of days mental health was not good.’  
 209 ‘Skipped meals’ was associated with ‘feeling bad about yourself,’ ‘feeling down, depressed, or  
 210 hopeless,’ ‘little interest in doing things,’ and ‘number of days mental health was not good.’

211 **Table 2. Bivariates analysis among the variables.**

212

|                                           | (a)     | (b)     | (c)     | (d)     | (e)     | (f)    | (g)    | (h)    | (i)     | (j)     | (k)     | (l)    | (m)    | (n) |
|-------------------------------------------|---------|---------|---------|---------|---------|--------|--------|--------|---------|---------|---------|--------|--------|-----|
| (a)Feeling bad about yourself             | 1       |         |         |         |         |        |        |        |         |         |         |        |        |     |
| (b)Feeling down, depressed, or hopeless   | .583**  | 1       |         |         |         |        |        |        |         |         |         |        |        |     |
| (c)Little interest in doing things        | .414**  | .515**  | 1       |         |         |        |        |        |         |         |         |        |        |     |
| (d)No. of days mental health was not good | .476**  | .599**  | .398**  | 1       |         |        |        |        |         |         |         |        |        |     |
| (e)Drank much water                       | .016    | .029*   | .010    | .057**  | 1       |        |        |        |         |         |         |        |        |     |
| (f)Ate less fat                           | .009    | -.004   | -.009   | .031*   | .486**  | 1      |        |        |         |         |         |        |        |     |
| (g)Ate fewer carbs                        | -.003   | -.019   | -.042** | .021    | .420**  | .457** | 1      |        |         |         |         |        |        |     |
| (h)Ate less food to lose weight           | .030*   | .016    | .015    | .056**  | .528**  | .493** | .388** | 1      |         |         |         |        |        |     |
| (i)Skipped meals                          | .053**  | .052**  | .055**  | .069**  | .369**  | .264** | .196** | .388** | 1       |         |         |        |        |     |
| (j)Age                                    | -.020   | -.023   | -.001   | -.051** | -.077** | .001   | -.016  | .005   | -.059** | 1       |         |        |        |     |
| (k)Gender                                 | .062**  | .077**  | .035*   | .110**  | .139**  | .085** | .088** | .122** | .071**  | -.081** | 1       |        |        |     |
| (l)Race & ethnicity                       | -.006   | -.019   | .012    | .037**  | .036**  | .020*  | .033** | .028** | .049**  | .077**  | -.001   | 1      |        |     |
| (m)Education level                        | -.070** | -.111** | -.111** | -.043** | .147**  | .111** | .150** | .096** | .030*   | -.095** | .047**  | .262** | 1      |     |
| (n)Household income                       | -.132** | -.159** | -.115** | -.080** | .065**  | .067** | .107** | .046** | -.002   | -.127** | -.044** | .076** | .415** | 1   |

213 *Note.* \*  $p < 0.05$ , \*\*  $p < 0.01$ .

214 Ordinal logistic regression estimates predicting the three mental health variables  
 215 measured by a Likert scale: ‘feeling bad about yourself,’ ‘feeling down, depressed, or hopeless,’  
 216 and ‘little interest in doing things’ are shown in Table 3.

217 Participants who reported ‘skipped meals’ were more likely to endorse ‘feeling bad about  
 218 yourself’ (OR = 1.659,  $p < .01$ ). ‘Skipped meals’ was also positively associated with ‘feeling  
 219 down, depressed, or hopeless’ (OR = 1.336,  $p < .05$ ). Lastly, ‘skipped meals’ had a positive  
 220 association with ‘little interest in doing things’ (OR = 1.517,  $p < .01$ ).

221 ‘Ate fewer carbohydrates had a positive association with ‘little interest in doing things’  
 222 (OR = .635,  $p < .01$ ). In other words, individuals who reported that they ate fewer carbohydrates  
 223 to lose weight were more likely to have little interest in doing things.

224 **Table 3. Associations between Feeling Bad about Yourself, Feeling Down, Depressed, or**  
 225 **Hopeless, and Little Interest in Doing Things and diet strategies as assessed from NHANES**  
 226 **2005-2006.**

| Variables                   | Feeling bad about yourself |                | Feeling down, depressed, or hopeless |                | Little Interest in Doing Things |                |
|-----------------------------|----------------------------|----------------|--------------------------------------|----------------|---------------------------------|----------------|
|                             | OR                         | 95% C.I.       | OR                                   | 95% C.I.       | OR                              | 95% C.I.       |
| <b>Diet Strategies</b>      |                            |                |                                      |                |                                 |                |
| Drank a lot of water        | .952                       | [.729, 1.244]  | 1.153                                | [.919, 1.447]  | 1.059                           | [.835, 1.342]  |
| Ate less fat to lose weight | 1.118                      | [.853, 1.465]  | 1.057                                | [.837, 1.335]  | 1.147                           | [.902, 1.459]  |
| Ate fewer carbohydrates     | .927                       | [.687, 1.252]  | .858                                 | [.662, 1.111]  | .635**                          | [.480, .840]   |
| Ate less to lose weight     | 1.101                      | [.871, 1.392]  | 1.022                                | [.837, 1.248]  | 1.070                           | [.869, 1.316]  |
| Skipped meals               | 1.659**                    | [1.235, 2.228] | 1.336*                               | [1.024, 1.744] | 1.517**                         | [1.159, 1.986] |
| <b>Covariates</b>           |                            |                |                                      |                |                                 |                |
| Age                         | .993*                      | [.988, .998]   | .993**                               | [.988, .997]   | .997                            | [.992, 1.001]  |
| <b>Gender (Ref = Male)</b>  |                            |                |                                      |                |                                 |                |
| Female                      | 1.347**                    | [1.118, 1.624] | 1.457***                             | [1.244, 1.707] | 1.321**                         | [1.123, 1.554] |
| <b>Race (Ref = White)</b>   |                            |                |                                      |                |                                 |                |
| African American            | .912                       | [.724, 1.148]  | 1.075                                | [.885, 1.307]  | 1.042                           | [.855, 1.272]  |

|                                         |         |               |         |               |         |               |
|-----------------------------------------|---------|---------------|---------|---------------|---------|---------------|
| Hispanic                                | .823    | [.642, 1.056] | .940    | [.763, 1.159] | .817    | [.656, 1.017] |
| Other race                              | .921    | [.561, 1.513] | .859    | [.557, 1.324] | 1.058   | [.690, 1.624] |
| Education (Ref = Less than high school) |         |               |         |               |         |               |
| High school/GED                         | .919    | [.711, 1.188] | .890    | [.718, 1.103] | .932    | [.746, 1.163] |
| College/AA                              | .950    | [.737, 1.224] | .750*   | [.603, .933]  | .833    | [.666, 1.041] |
| College or above                        | .680*   | [.489, .945]  | .637**  | [.485, .837]  | .520*** | [.389, .696]  |
| Household income                        | .881*** | [.852, .912]  | .884*** | [.859, .910]  | .921*** | [.894, .949]  |

227 Note. Reference categories are in parentheses; OR = odds ratio; C.I. = confidence intervals

228 \*  $p < 0.05$ ; \*\*  $p < 0.01$ ; \*\*\*  $p < 0.001$

229  
 230 The results from a negative binomial regression model predicting ‘the number of days  
 231 mental health was not good’ are shown in Table 4. None of the dietary variables was  
 232 significantly associated with an increased odd of reporting more days of poor mental health.

233  
 234 **Table 4. Associations between the Number of Days Mental Health was Not Good and diet**  
 235 **strategies as assessed from NHANES 2005-2006.**

| Variables                   | Number of days mental health was not good |                |
|-----------------------------|-------------------------------------------|----------------|
|                             | OR                                        | 95% C.I.       |
| <b>Diet Strategies</b>      |                                           |                |
| Drank a lot of water        | 1.151                                     | [.899, 1.474]  |
| Ate less fat to lose weight | 1.073                                     | [.833, 1.382]  |
| Ate fewer carbohydrates     | .953                                      | [.720, 1.260]  |
| Ate less to lose weight     | 1.021                                     | [.818, 1.275]  |
| Skipped meals               | 1.171                                     | [.858, 1.597]  |
| <b>Covariates</b>           |                                           |                |
| Age                         | .991**                                    | [.986, .996]   |
| Gender (Ref = Male)         |                                           |                |
| Female                      | 1.542***                                  | [1.300, 1.829] |
| Race (Ref = White)          |                                           |                |
| African American            | .883                                      | [.713, 1.094]  |
| Hispanic                    | .681**                                    | [.541, .856]   |

|                                         |          |                 |
|-----------------------------------------|----------|-----------------|
| Other race                              | .786     | [.506, 1.222]   |
| Education (Ref = Less than high school) |          |                 |
| High school/GED                         | 1.079    | [.844, 1.381]   |
| College/AA                              | 1.020    | [.800, 1.300]   |
| College or above                        | .705*    | [.533, .933]    |
| Household income                        | .931***  | [.903, .959]    |
| Constant                                | 7.507*** | [4.938, 11.410] |

236 Note. Reference categories are in parentheses; OR = odds ratio; C.I. = confidence intervals

237 \*  $p < 0.05$ ; \*\*  $p < 0.01$ ; \*\*\*  $p < 0.001$

238

239

## Discussion

240 In the analysis of the NHANES 2005-2006 dataset, we found varying associations  
241 between dietary changes and mental health status. In regression analysis controlling for age, sex,  
242 race, educational level, and annual household income, one of the variables, ‘skipped meals,’ was  
243 positively associated with ‘feeling bad about yourself,’ ‘feeling down, depressed, or hopeless,’  
244 and ‘little interest in doing things.’ ‘Ate fewer carbohydrates’ was positively associated with  
245 ‘little interest in doing things.’ While the results support our hypothesis that skipping meals  
246 would have a negative association with mental health, they disagree with our initial claim that  
247 reduced carbohydrate intake would be correlated to positive mental health. The results also differ  
248 from our initial belief in that eating less fat, eating less, and drinking more water would show a  
249 significant association with the mental health variables. Our findings indicate that specific  
250 dietary changes to lose weight may be associated with differing mental health statuses, which  
251 may be relevant for healthcare professionals advising on weight loss strategies.

252 Our results have several significant clinical implications. Our finding on the potential  
253 association between reduced carbohydrate intake and ‘little interest in doing things’ may be  
254 supported by prior literature that carbohydrates are essential in maintaining proper mental health

255 [33]. Professionals should recommend that patients limit refined carbohydrates but maintain  
256 appropriate carbohydrate intake overall while proceeding with weight loss. Meanwhile, we found  
257 that ‘skipping meals’ is associated with poorer mental health status, which is consistent with  
258 prior studies’ results [26,34,35]. Skipping meals is known to be associated with negative physical  
259 health consequences, including a reduced metabolism that can even promote weight gain when  
260 an individual consumes their typical food portions [36]. Thus, clinicians can emphasize how  
261 weight loss can be achieved through eating a healthy, balanced diet without skipping meals.

262 Our findings also indicate the necessity of integrating considerations for mental health in  
263 weight loss. To tailor weight loss strategies and interventions appropriately, it is crucial to  
264 incorporate an understanding of patients' mental health. Clinicians should be cognizant of the  
265 diverse weight loss programs and interventions available, particularly those explicitly designed  
266 with mental health considerations. For instance, implementing interventions like a stress  
267 management program, as demonstrated by effectiveness in not only reducing weight or BMI but  
268 also decreasing depression and anxiety scores [37], can ensure that patients achieve their weight  
269 loss goals while safeguarding their mental health.

270 This study included regression analysis to examine the relationship between weight  
271 loss strategies and mental health status. While this analysis treated mental health status as a  
272 dependent variable, previous research employing regression analysis has also established a  
273 significant association between improvements in mental health symptoms during weight loss  
274 treatment and actual weight loss. This suggests that there may be meaningful implications in  
275 both directions between dietary changes and mental health [38,39]. Recognizing the association  
276 between certain strategies for weight loss and mental health status during the weight loss process  
277 underscores the imperative to discuss patients' past and present mental health experiences.  
278 Identifying vulnerabilities or predispositions to adverse mental health symptoms allows

279 clinicians to proactively recognize patients at risk during their weight loss journey. Incorporating  
280 additional assessments ensures that these individuals receive appropriate, mental health-informed  
281 care throughout the weight loss process.

## 282 **Limitations**

283           There are several limitations of this study. The NHANES dataset is cross-sectional and  
284 observational, meaning we cannot define the directionality of the relationship between  
285 participants' dietary changes and their mental health status and whether there is causality.  
286 Therefore, future studies should include longitudinal data and consider including potential  
287 mediators such as stress in their research designs. Next, while the 2005-2006 dataset contained  
288 questions that asked about people's dietary changes in losing weight, more recent datasets did  
289 not include these questions, preventing this study from utilizing a more recent dataset that could  
290 be more generalizable to the current U.S. population. Even though NHANES is representative of  
291 the U.S. population, the 2005-2006 dataset also neglected the unique outcomes of Asian  
292 Americans or Native Americans by combining them under "other races or multi/bi-racial."  
293 Future research exploring similar questions should incorporate more diverse racial and ethnic  
294 populations and observe their associations over time to yield results applicable to more diverse  
295 groups of people. Third, we could not differentiate the type of fat or carbohydrates the  
296 participants tried to reduce in their dietary changes. Prior studies have found that consuming  
297 more saturated fatty acids was associated with poorer mental health, while consuming more  
298 unsaturated fatty acids was associated with better mental health [17,18]; we could not examine  
299 the associations of different types of fats with mental health status because this information was  
300 not available in the dataset. Finally, our mental health variables captured mainly depression



301 symptoms rather than the broad spectrum of mental illness. Future studies should utilize  
302 variables capturing other aspects of mental health.

303 Finally, measuring a mental construct with selective questions is problematic. It may not  
304 capture the construct sufficiently and accurately. For instance, as opposed to our last question,  
305 “How many days during the past 30 days has your mental health not been good?” the first three  
306 questions were more likely to show depressive symptoms or emotions, indicating different  
307 constructs (e.g., stress, depression, and problems with emotions). Therefore, future studies  
308 should design questions with high construct validity.

## 309 **Conclusion**

310 Our results make clear that individuals seeking weight loss should receive support from  
311 healthcare professionals in determining the weight loss strategies that would be most appropriate  
312 while supporting maintenance of mental health. With practical advice, individuals can choose  
313 weight loss strategies that may be associated with improvements in both physical and mental  
314 health.

315

## 316 **Acknowledgements**

317 We would like to acknowledge Johns Hopkins University in their support for the publication  
318 funding for this paper. We also would like to acknowledge Dr. Keeyoon Noh’s time analyzing  
319 and interpreting the NHANES 2005-2006 dataset for our study.

320

## **References**

- 321 1. Centers for Disease Control and Prevention. Health Effects of Overweight and  
322 Obesity [Internet]. 2022 [cited 2023 Sep 1]. Available from:  
323 <https://www.cdc.gov/healthyweight/effects/index.html>
- 324 2. Martin CB, Herrick KA, Sarafrazi N, Ogden CL. Attempts to Lose Weight  
325 Among Adults in the United States, 2013-2016. NCHS Data Brief. 2018 Jul;(313):1–8.
- 326 3. Safaei M, Sundararajan EA, Driss M, Boulila W, Shapi'i A. A systematic  
327 literature review on obesity: Understanding the causes & consequences of obesity and  
328 reviewing various machine learning approaches used to predict obesity. *Comput Biol*  
329 *Med.* 2021 Sep;136:104754.
- 330 4. Collins, K. Doctors on fat: Don't ask, don't tell [Internet]. nbcnews; 2003.  
331 Available from: <https://www.nbcnews.com/id/wbna3679207>
- 332 5. Tremblett M, Poon AYZ, Aveyard P, Albury C. What advice do general  
333 practitioners give to people living with obesity to lose weight? A qualitative content  
334 analysis of recorded interactions. *Fam Pract.* 2022 Dec 13;cmac137.
- 335 6. Lee A, Cardel M, Donahoo WT. Social and Environmental Factors Influencing  
336 Obesity. In: Feingold KR, Anawalt B, Blackman MR, Boyce A, Chrousos G, Corpas E, et  
337 al., editors. *Endotext* [Internet]. South Dartmouth (MA): MDText.com, Inc.; 2000 [cited  
338 2023 Dec 27]. Available from: <http://www.ncbi.nlm.nih.gov/books/NBK278977/>
- 339 7. Lasikiewicz N, Myrissa K, Hoyland A, Lawton CL. Psychological benefits of  
340 weight loss following behavioural and/or dietary weight loss interventions. A systematic  
341 research review. *Appetite.* 2014 Jan;72:123–37.
- 342 8. Jackson SE, Steptoe A, Beeken RJ, Kivimaki M, Wardle J. Psychological  
343 Changes following Weight Loss in Overweight and Obese Adults: A Prospective Cohort  
344 Study. Franken IHa, editor. *PLoS ONE.* 2014 Aug 6;9(8):e104552.
- 345 9. Berenson T. Losing Weight Could Make You Depressed, Study Says [Internet].  
346 *TIME*; 2014. Available from: <https://time.com/3092086/weight-loss-depression/>
- 347 10. Dam RM van, Seidell JC. Carbohydrate intake and obesity. *Eur J Clin Nutr.*  
348 2007;61:S75–99.
- 349 11. Christensen L. The effect of carbohydrates on affect. *Nutr Burbank Los Angel*  
350 *Cty Calif.* 1997 Jun;13(6):503–14.

- 351 12. Gopinath B, Flood VM, Burlutsky G, Louie JCY, Mitchell P. Association  
352 between carbohydrate nutrition and prevalence of depressive symptoms in older adults. *Br*  
353 *J Nutr.* 2016;116(12):2109–14.
- 354 13. Kose J, Duquenne P, Robert M, Debras C, Galan P, Péneau S, et al. Associations  
355 of overall and specific carbohydrate intake with anxiety status evolution in the prospective  
356 NutriNet-Santé population-based cohort. *Sci Rep.* 2022 Dec 14;12(1):21647.
- 357 14. Varae H, Darand M, Hassanizadeh S, Hosseinzadeh M. Effect of low-  
358 carbohydrate diet on depression and anxiety: A systematic review and meta-analysis of  
359 controlled trials. *J Affect Disord.* 2023 Mar;325:206–14.
- 360 15. Zemdegs J, Quesseveur G, Jarriault D, Pénicaud L, Fioramonti X, Guiard BP.  
361 High-fat diet-induced metabolic disorders impairs 5-HT function and anxiety-like  
362 behavior in mice. *Br J Pharmacol.* 2016 Jul;173(13):2095–110.
- 363 16. Wells AS, Read NW, Laugharne JDE, Ahluwalia NS. Alterations in mood after  
364 changing to a low-fat diet. *Br J Nutr.* 1998 Jan;79(1):23–30.
- 365 17. Fatemi F, Siassi F, Qorbani M, Sotoudeh G. Higher dietary fat quality is  
366 associated with lower anxiety score in women: a cross-sectional study. *Ann Gen*  
367 *Psychiatry.* 2020 Dec;19(1):14.
- 368 18. Daley C, Patterson A, Sibbritt D, MacDonald-Wicks L. Unsaturated fat intakes  
369 and mental health outcomes in young women from the Australian Longitudinal Study on  
370 Women's Health. *Public Health Nutr.* 2015 Feb;18(3):546–53.
- 371 19. Wardle J, Rogers P, Judd P, Taylor MA, Rapoport L, Green M, et al. Randomized  
372 trial of the effects of cholesterol-lowering dietary treatment on psychological function.  
373 *Am J Med.* 2000 May;108(7):547–53.
- 374 20. Wilson JJ, McMullan I, Blackburn NE, Klempel N, Yakkundi A, Armstrong NC,  
375 et al. Changes in dietary fat intake and associations with mental health in a UK public  
376 sample during the COVID-19 pandemic. *J Public Health Oxf Engl.* 2021 Dec  
377 10;43(4):687–94.
- 378 21. Vij VAK, Joshi AS. Effect of excessive water intake on body weight, body mass  
379 index, body fat, and appetite of overweight female participants. *J Nat Sci Biol Med.* 2014  
380 Jul;5(2):340–4.

- 381 22. Boschmann M, Steiniger J, Hille U, Tank J, Adams F, Sharma AM, et al. Water-  
382 induced thermogenesis. *J Clin Endocrinol Metab.* 2003 Dec;88(12):6015–9.
- 383 23. Pross N, Demazières A, Girard N, Barnouin R, Metzger D, Klein A, et al. Effects  
384 of changes in water intake on mood of high and low drinkers. *PLoS One.*  
385 2014;9(4):e94754.
- 386 24. Ganio MS, Armstrong LE, Casa DJ, McDermott BP, Lee EC, Yamamoto LM, et  
387 al. Mild dehydration impairs cognitive performance and mood of men. *Br J Nutr.* 2011  
388 Nov;106(10):1535–43.
- 389 25. Muscaritoli M. The Impact of Nutrients on Mental Health and Well-Being:  
390 Insights From the Literature. *Front Nutr.* 2021;8:656290.
- 391 26. Zahedi H, Djalalinia S, Sadeghi O, Zare Garizi F, Asayesh H, Payab M, et al.  
392 Breakfast consumption and mental health: a systematic review and meta-analysis of  
393 observational studies. *Nutr Neurosci.* 2022 Jun;25(6):1250–64.
- 394 27. Azemati B, Heshmat R, Qorbani M, Ahadi Z, Azemati A, Shafiee G, et al.  
395 Association of meal skipping with subjective health complaints in children and  
396 adolescents: the CASPIAN-V study. *Eat Weight Disord EWD.* 2020 Feb;25(1):241–6.
- 397 28. Blaine BE, Rodman J, Newman JM. Weight Loss Treatment and Psychological  
398 Well-being: A Review and Meta-analysis. *J Health Psychol.* 2007 Jan;12(1):66–82.
- 399 29. Chaitoff A, Swetlik C, Ituarte C, Pfoh E, Lee LL, Heinberg LJ, et al. Associations  
400 Between Unhealthy Weight-Loss Strategies and Depressive Symptoms. *Am J Prev Med.*  
401 2019 Feb;56(2):241–50.
- 402 30. Fabricatore AN, Wadden TA, Higginbotham AJ, Faulconbridge LF, Nguyen AM,  
403 Heymsfield SB, et al. Intentional weight loss and changes in symptoms of depression: a  
404 systematic review and meta-analysis. *Int J Obes.* 2011;35(11):1363–76.
- 405 31. ICPSR. National Health and Nutrition Examination Survey (NHANES), 2005-  
406 2006 (ICPSR 25504) [Internet]. Institute for Social Research University of Michigan;  
407 2023. Available from: <https://www.icpsr.umich.edu/web/ICPSR/studies/25504>
- 408 32. U.S. Department of Health and Human Services Center for Disease Control and  
409 Prevention National Center for Health Statistics. National Health and Nutrition  
410 Examination Survey: Sample Design, 1999-2006. Available from  
411 <https://wwwn.cdc.gov/nchs/nhanes/analyticguidelines.aspx>

- 412 33. Kroenke K, Spitzer RL, Williams JB. The PHQ-9: validity of a brief depression  
413 severity measure. *J Gen Intern Med*. 2001 Sep;16(9):606–13.
- 414 34. Clemente-Suárez VJ, Mielgo-Ayuso J, Martín-Rodríguez A, Ramos-Campo DJ,  
415 Redondo-Flórez L, Tornero-Aguilera JF. The Burden of Carbohydrates in Health and  
416 Disease. *Nutrients*. 2022 Sep 15;14(18):3809.
- 417 35. Lee G, Han K, Kim H. Risk of mental health problems in adolescents skipping  
418 meals: The Korean National Health and Nutrition Examination Survey 2010 to 2012. *Nurs*  
419 *Outlook*. 2017;65(4):411–9.
- 420 36. Stanton R, Best T, Williams S, Vandelanotte C, Irwin C, Heidke P, et al.  
421 Associations between health behaviors and mental health in Australian nursing students.  
422 *Nurse Educ Pract*. 2021 May;53:103084.
- 423 37. Koppersmith N, Kennedy C. Perils of Skipping Meals [Internet]. University of  
424 Louisville Research Foundation Inc.; 2005. Available from:  
425 <https://louisville.edu/medicine/departments/familymedicine/files/L081611.pdf>
- 426 38. Xenaki N, Bacopoulou F, Kokkinos A, Nicolaides NC, Chrousos GP, Darviri C.  
427 Impact of a stress management program on weight loss, mental health and lifestyle in  
428 adults with obesity: a randomized controlled trial. *J Mol Biochem*. 2018;7(2):78–84.
- 429 39. Alhalel N, Schueller SM, O'Brien MJ. Association of changes in mental health  
430 with weight loss during intensive lifestyle intervention: does the timing matter? *Obes Sci*  
431 *Pract*. 2018 Apr;4(2):153–8.
- 432 40. Payne ME, Porter Starr KN, Orenduff M, Mulder HS, McDonald SR, Spira AP, et  
433 al. Quality of Life and Mental Health in Older Adults with Obesity and Frailty:  
434 Associations with a Weight Loss Intervention. *J Nutr Health Aging*. 2018;22(10):1259–  
435 65.
- 436
